# Supplementary material for: Analysis of the variation pattern in left upper division veins and establishment of simplified vein models for anatomical segmentectomy
Source: PubMed Central journal article supplement — Ann Transl Med. 2020 Nov;8(22):1515. doi: 10.21037/atm-20-6925 (PMC7729311; doi:10.21037/atm-20-6925), 2020-11
Supplement: atm-08-22-1515-supplementary.pdf [file atm-08-22-1515-supplementary.pdf]

**Table S1** The incidence of ascending A<sup>3</sup> a (ASC. A<sup>3</sup>a) and values of X (cm), Y (cm) and f(X/Y) in two groups

| Group & No. | ASC.A3a | X(cm) | Y(cm) | f    | Group & No. | ASC.A3a | X(cm) | Y(cm) | f    | Group & No. | ASC.A3a | X(cm) | Y(cm) | f    |
|-------------|---------|-------|-------|------|-------------|---------|-------|-------|------|-------------|---------|-------|-------|------|
| Group 1-1   | ✓       | 3.84  | 9.99  | 0.38 | Group 2-11  | ×       | 15.51 | 3.47  | 4.46 | Group 2-53  | ×       | 6.62  | 4.93  | 1.34 |
| Group 1-2   | ✓       | 7.6   | 11.01 | 0.69 | Group 2-12  | ×       | 7.01  | 6.45  | 1.09 | Group 2-54  | ×       | 8.11  | 4.79  | 1.7  |
| Group 1-3   | ✓       | 7.9   | 19.17 | 0.41 | Group 2-13  | ×       | 4.79  | 6.44  | 0.74 | Group 2-55  | ×       | 8.57  | 7.53  | 1.14 |
| Group 1-4   | ×       | 4.87  | 10.13 | 0.48 | Group 2-14  | ×       | 8.69  | 4.08  | 2.13 | Group 2-56  | ×       | 14.74 | 5.81  | 2.54 |
| Group 1-5   | ✓       | 9.41  | 9.48  | 0.99 | Group 2-15  | ×       | 7.35  | 9.86  | 0.75 | Group 2-57  | ×       | 7.97  | 5.06  | 1.58 |
| Group 1-6   | ×       | 5.86  | 12.1  | 0.48 | Group 2-16  | ✓       | 7.97  | 8.97  | 0.89 | Group 2-58  | ×       | 4.92  | 6.14  | 0.8  |
| Group 1-7   | ✓       | 10.61 | 11.76 | 0.9  | Group 2-17  | ×       | 8.51  | 4.42  | 1.93 | Group 2-59  | ×       | 13.6  | 13.39 | 1.02 |
| Group 1-8   | ✓       | 6.64  | 11.98 | 0.55 | Group 2-18  | ×       | 10.16 | 6.99  | 1.45 | Group 2-60  | ×       | 4.78  | 4.99  | 0.96 |
| Group 1-9   | ×       | 4.94  | 6.24  | 0.79 | Group 2-19  | ×       | 18.77 | 6.34  | 2.96 | Group 2-61  | ×       | 9.32  | 7.2   | 1.29 |
| Group 1-10  | ✓       | 2.02  | 9.44  | 0.21 | Group 2-20  | ×       | 7.72  | 9.02  | 0.86 | Group 2-62  | ×       | 5.74  | 8.88  | 0.65 |
| Group 1-11  | ✓       | 6.46  | 9.92  | 0.65 | Group 2-21  | ×       | 7.38  | 10.51 | 0.7  | Group 2-63  | ✓       | 8.32  | 8.32  | 1    |
| Group 1-12  | ✓       | 5.02  | 10.36 | 0.48 | Group 2-22  | ×       | 6.63  | 6.97  | 0.95 | Group 2-64  | ×       | 5.36  | 7.85  | 0.68 |
| Group 1-13  | ✓       | 7.41  | 9.89  | 0.75 | Group 2-23  | ×       | 10.05 | 6.87  | 1.46 | Group 2-65  | ×       | 7.33  | 5.68  | 1.29 |
| Group 1-14  | ×       | 6.4   | 14.89 | 0.43 | Group 2-24  | ×       | 9.39  | 6.56  | 1.43 | Group 2-66  | ×       | 7.66  | 4.94  | 1.55 |
| Group 1-15  | ×       | 6.92  | 8.02  | 0.86 | Group 2-25  | ×       | 8.55  | 5.77  | 1.48 | Group 2-67  | ×       | 8.29  | 11.46 | 0.72 |
| Group 1-16  | ×       | 7.3   | 10    | 0.73 | Group 2-26  | ×       | 7.2   | 12.84 | 0.56 | Group 2-68  | ×       | 16.8  | 5.83  | 2.88 |
| Group 1-17  | ×       | 3.57  | 7.94  | 0.45 | Group 2-27  | ×       | 20.42 | 8     | 2.55 | Group 2-69  | ×       | 6.29  | 8.84  | 0.71 |
| Group 1-18  | ×       | 6.21  | 11.93 | 0.52 | Group 2-28  | ×       | 17.7  | 2.37  | 7.48 | Group 2-70  | ×       | 4.83  | 6.06  | 0.8  |
| Group 1-19  | ✓       | 9.07  | 5.14  | 1.76 | Group 2-29  | ×       | 8.63  | 4.87  | 1.77 | Group 2-71  | ×       | 14.19 | 5.45  | 2.6  |
| Group 1-20  | ✓       | 6.84  | 12.3  | 0.56 | Group 2-30  | ×       | 12.06 | 10.68 | 1.13 | Group 2-72  | ×       | 10.04 | 9.01  | 1.11 |
| Group 1-21  | ×       | 4.59  | 14.9  | 0.31 | Group 2-31  | ×       | 9.76  | 8.84  | 1.1  | Group 2-73  | ×       | 9.17  | 8.23  | 1.11 |
| Group 1-22  | ×       | 5.14  | 7.62  | 0.67 | Group 2-32  | ×       | 12.57 | 3.22  | 3.91 | Group 2-74  | ×       | 12.85 | 4.16  | 3.09 |
| Group 1-23  | ×       | 5.65  | 3.24  | 1.74 | Group 2-33  | ×       | 11.24 | 3.96  | 2.84 | Group 2-75  | ×       | 10.09 | 2.56  | 3.95 |
| Group 1-24  | ×       | 3.48  | 7.47  | 0.47 | Group 2-34  | ×       | 6.08  | 4.03  | 1.51 | Group 2-76  | ×       | 13.09 | 8.53  | 1.54 |
| Group 1-25  | ×       | 6.09  | 6.42  | 0.95 | Group 2-35  | ×       | 15.63 | 3.99  | 3.92 | Group 2-77  | ×       | 6.9   | 4.56  | 1.51 |
| Group 1-26  | ✓       | 1.04  | 15.47 | 0.07 | Group 2-36  | ×       | 8.93  | 4.19  | 2.13 | Group 2-78  | ×       | 13.19 | 9.73  | 1.36 |
| Group 1-27  | ✓       | 5.63  | 10.1  | 0.56 | Group 2-37  | ×       | 5.89  | 7.12  | 0.83 | Group 2-79  | ×       | 8.73  | 11.05 | 0.79 |
| Group 1-28  | ×       | 8.55  | 6.96  | 1.23 | Group 2-38  | ×       | 14.66 | 5.31  | 2.76 | Group 2-80  | ×       | 11.08 | 3.4   | 3.26 |
| Group 1-29  | ✓       | 3.79  | 13.45 | 0.28 | Group 2-39  | ×       | 9.24  | 12.4  | 0.74 | Group 2-81  | ×       | 5.97  | 5.19  | 1.15 |
| Group 1-30  | ✓       | 5.73  | 3.95  | 1.45 | Group 2-40  | ×       | 6.24  | 3.31  | 1.89 | Group 2-82  | ×       | 13.19 | 5.16  | 2.55 |
| Group 1-31  | ✓       | 8.18  | 14.56 | 0.56 | Group 2-41  | ×       | 7.68  | 6.11  | 1.26 | Group 2-83  | ×       | 11.99 | 5.74  | 2.09 |
| Group 1-32  | ✓       | 7.2   | 9.77  | 0.74 | Group 2-42  | ×       | 10.11 | 4.67  | 2.16 | Group 2-84  | ×       | 15.26 | 3.83  | 3.99 |
| Group 2-1   | ×       | 6.63  | 5.05  | 1.31 | Group 2-43  | ×       | 17.12 | 10.51 | 1.63 | Group 2-85  | ×       | 9.19  | 3.79  | 2.42 |
| Group 2-2   | ×       | 8.56  | 5.97  | 1.44 | Group 2-44  | ×       | 8.9   | 5.07  | 1.76 | Group 2-86  | ×       | 9.72  | 5.73  | 1.7  |
| Group 2-3   | ×       | 6.59  | 7.75  | 0.85 | Group 2-45  | ×       | 9.27  | 8.33  | 1.11 | Group 2-87  | ×       | 5.09  | 5.23  | 0.97 |
| Group 2-4   | ×       | 9.15  | 5.4   | 1.69 | Group 2-46  | ×       | 8.37  | 1.71  | 4.9  | Group 2-88  | ×       | 6.04  | 3.45  | 1.75 |
| Group 2-5   | ×       | 9.77  | 7.29  | 1.34 | Group 2-47  | ×       | 5.58  | 4.76  | 1.17 | Group 2-89  | ×       | 5.93  | 2.96  | 2    |
| Group 2-6   | ×       | 9.77  | 3.94  | 2.48 | Group 2-48  | ×       | 6.62  | 3.24  | 2.04 | Group 2-90  | ×       | 13.16 | 1.87  | 7.04 |
| Group 2-7   | ×       | 9.85  | 7.87  | 1.25 | Group 2-49  | ×       | 9.16  | 11.96 | 0.77 | Group 2-91  | ×       | 5.8   | 9.19  | 0.63 |
| Group 2-8   | ×       | 14.87 | 4.88  | 3.05 | Group 2-50  | ×       | 3.12  | 7.68  | 0.41 | Group 2-92  | ×       | 7.15  | 7.15  | 1    |
| Group 2-9   | ×       | 6.12  | 4.62  | 1.32 | Group 2-51  | ×       | 11.46 | 4.33  | 2.65 |             |         |       |       |      |
| Group 2-10  | ×       | 6.64  | 3.94  | 1.69 | Group 2-52  | ×       | 7.35  | 3.21  | 2.29 |             |         |       |       |      |
